# Supplementary material
Source: bioRxiv or medRxiv preprint supplement (https://www.biorxiv.org/highwire/filestream/60497/field_highwire_adjunct_files/0/108290-1.pdf)
Supplement: Supplementary file [file 108290-1.pdf]

## Supplementary material for “Extremely rare variants reveal patterns of germline mutation rate heterogeneity in humans”

Jedidiah Carlson<sup>1</sup>, Adam E Locke<sup>2</sup>, Matthew Flickinger<sup>3</sup>, Matthew Zawistowski<sup>3</sup>, Shawn Levy<sup>4</sup>, Richard M Myers<sup>4</sup>, Michael Boehnke<sup>3</sup>, Hyun Min Kang<sup>3</sup>, Laura J Scott<sup>3†</sup>, Jun Z Li<sup>1,5†‡</sup>, Sebastian Zöllner<sup>3,6†‡</sup>, Devin Absher<sup>4</sup>, Huda Akil<sup>7</sup>, Gerome Breen<sup>8</sup>, Margit Burmeister<sup>1,5,6,7</sup>, Sarah Cohen-Woods<sup>9</sup>, William G Iacono<sup>10</sup>, James A Knowles<sup>11</sup>, Lisa Legrand<sup>10</sup>, Qing Lu<sup>12</sup>, Matthew McGue<sup>10</sup>, Melvin G McInnis<sup>6</sup>, Carlos N Pato<sup>13</sup>, Michele T Pato<sup>14</sup>, Margarita Rivera<sup>8</sup>, Janel L Sobell<sup>11</sup>, John B Vincent<sup>15</sup>, Stanley J Watson<sup>7</sup>

<sup>1</sup>Department of Computational Medicine & Bioinformatics, University of Michigan, Ann Arbor, MI, USA

<sup>2</sup>McDonnell Genome Institute & Department of Medicine, Washington University, St. Louis, MO, USA

<sup>3</sup>Department of Biostatistics, University of Michigan, Ann Arbor, MI, USA

<sup>4</sup>HudsonAlpha Institute for Biotechnology, Huntsville, AL, USA

<sup>5</sup>Department of Human Genetics, University of Michigan, Ann Arbor, MI, USA

<sup>6</sup>Department of Psychiatry, University of Michigan, Ann Arbor, MI, USA

<sup>7</sup>Molecular & Behavioral Neuroscience Institute, University of Michigan, Ann Arbor, MI, USA

<sup>8</sup>MRC Social Genetic and Developmental Psychiatry Centre, Institute of Psychiatry Psychology and Neuroscience, King's College London, London, UK

<sup>9</sup>School of Psychology, Flinders University, Adelaide, South Australia, AU

<sup>10</sup>Department of Psychology, University of Minnesota, Minneapolis, MN, USA

<sup>11</sup>Department of Psychiatry and the Behavioral Sciences, University of Southern California, Los Angeles, CA, USA

<sup>12</sup>Department of Epidemiology and Biostatistics, Michigan State University, East Lansing, MI, USA

<sup>13</sup>Dean of The College of Medicine, Senior Vice President for Research, SUNY Downstate Medical Center, Brooklyn, NY, USA

<sup>14</sup>Department of Psychiatry, SUNY Downstate Medical Center, Brooklyn, NY, USA

<sup>15</sup>Molecular Neuropsychiatry and Development Laboratory; Campbell Family Mental Health Research Institute, Toronto, ON, CA

<sup>†</sup>*authors contributed equally*

<sup>‡</sup>*to whom correspondence should be addressed*

## Table of Contents

|                                                                                    |    |
|------------------------------------------------------------------------------------|----|
| Supplementary Note .....                                                           | 3  |
| Supplementary Note 1. Identification of outlier samples .....                      | 3  |
| Supplementary Note 2. Estimation of false discovery rate by Ts/Tv statistics ..... | 3  |
| Supplementary Note 3. Potential sources of bias among ERVs .....                   | 4  |
| 3.1. Motif-specific error rates.....                                               | 4  |
| 3.2. Mapping error .....                                                           | 5  |
| 3.3. Mispolarization of ERVs .....                                                 | 6  |
| Supplementary Note 4. Curation of MAC10+-derived mutation rate estimates .....     | 7  |
| Supplementary Note 5. Potential mechanisms for NTTAAA hypermutability .....        | 8  |
| Acknowledgements .....                                                             | 9  |
| References.....                                                                    | 10 |
| Supplementary Figures.....                                                         | 11 |
| Supplementary Figure 1 .....                                                       | 12 |
| Supplementary Figure 2 .....                                                       | 13 |
| Supplementary Figure 3 .....                                                       | 14 |
| Supplementary Figure 4 .....                                                       | 15 |
| Supplementary Figure 5 .....                                                       | 16 |
| Supplementary Figure 6 .....                                                       | 17 |
| Supplementary Figure 7 .....                                                       | 18 |
| Supplementary Tables .....                                                         | 19 |
| Supplementary Table 1 .....                                                        | 19 |
| Supplementary Tables 2a-2d .....                                                   | 19 |
| Supplementary Table 3 .....                                                        | 20 |
| Supplementary Table 4 .....                                                        | 21 |
| Supplementary Table 5 .....                                                        | 21 |
| Supplementary Table 6 .....                                                        | 22 |
| Supplementary Table 7 .....                                                        | 25 |
| Supplementary Table 8 .....                                                        | 26 |
| Supplementary Table 9 .....                                                        | 27 |

# 1 Supplementary Note

## 2 **Supplementary Note 1. Identification of outlier samples**

3 Our NMF-based filtering strategy identified 156 potential outliers in the BRIDGES data. These outliers  
4 exhibited one of two distinct mutation signatures. The first signature, characterized by an unusually high  
5 proportion of C>A and G>T singletons, was overrepresented in 112 of these samples, consistent with  
6 patterns of oxidative damage that are known to occur during DNA shearing, likely due to the presence  
7 of reactive contaminants<sup>1</sup>. The second outlier signature, characterized by depleted rates of C>N and  
8 G>N singletons, was overrepresented in the remaining 44 samples. Upon further investigation of the  
9 samples carrying this signature, we found that many showed a trend of higher GC bias (i.e.,  
10 systematically lower depth of coverage in GC-rich regions), likely leading to lower calling rates for C>N  
11 and G>N types. Moreover, 24 of the 44 samples were sequenced in the same batch, and the remaining  
12 20 samples were distributed across only 8 of the 48 other batches, indicating that these coverage  
13 biases and resulting error signatures were a result of batch effects. Note that doubletons in the pre-  
14 filtered sample that would have become singletons in the post-filtered sample were not included in our  
15 analysis. Many of these variants are likely true doubletons in the BRIDGES sample and hence present  
16 in the population at a higher frequency (i.e., having arose further in the past) than the average  
17 singleton, so retaining these ambiguous variants might inadvertently affect the distribution of variants.

## 18 **Supplementary Note 2. Estimation of false discovery rate by Ts/Tv statistics**

19 We estimate the false discovery rate among BRIDGES ERVs using the following method.

20 (1) Let  $TS_o = TS_{tp} + TS_{fp}$  be the number of observed transitions (23,733,766), consisting of both  
21 true positives ( $TS_{tp}$ ), and false positives ( $TS_{fp}$ )

22 (2) Let  $TV_o = TV_{tp} + TV_{fp}$  be the number of observed transversions (11,840,651).

23 (3) Based on findings from other large-scale sequencing studies, the true positive Ts/Tv ratio,

24  $TSTV_T = \frac{TS_{tp}}{TV_{tp}}$  is expected to be between 2.0 and 2.1<sup>2</sup>.

25 (4) Because there are 8 possible transversions and 4 possible transitions, if errors have occurred at  
26 random, the Ts/Tv ratio for random false positive errors ( $TSTV_{\epsilon}$ ) should be 0.5, that is,  $\frac{TS_{fp}}{TV_{fp}} =$   
27 0.5, assuming no systematic sequencing error biases.

28 Solving this system of four equations, it follows that  $TV_{fp} = \frac{TSTV_T \times TV_o - TS_o}{TSTV_T - 0.5}$  and  $TS_{fp} = 0.5 \times TV_{fp}$ , so the  
29 false discovery rate,  $\frac{TS_{fp} + TV_{fp}}{TS_o + TV_o}$ , can be estimated as:

$$30 \quad \frac{TS_{fp} + TV_{fp}}{TS_o + TV_o} = \frac{0.5 \left( \frac{TSTV_T \times TV_o - TS_o}{TSTV_T - 0.5} \right) + \frac{TSTV_T \times TV_o - TS_o}{TSTV_T - 0.5}}{TS_o + TV_o}$$

31 Assuming a true  $TSTV_T$  between 2.0 and 2.1, by this calculation we estimate a false discovery rate of  
32 0.1-2.9% among the BRIDGES ERVs.

### 33 **Supplementary Note 3. Potential sources of bias among ERVs**

#### 34 **3.1. Motif-specific error rates**

35 It has been shown that certain sequence motifs may be more susceptible to sequencing error, which  
36 could lead to a non-random distribution of false positive singleton calls and subsequently bias our  
37 analyses<sup>5,6</sup>. Allhoff et al. (2013)<sup>6</sup> reported context-specific errors for the Illumina HiSeq platform, noting  
38 that the most common of these are strand-specific T>N errors at 5'-GGGT-3' motifs (i.e., there is no  
39 evidence of an excess of A>N errors at the reverse complement 5'-ACCC-3' motifs). We reason that if  
40 the BRIDGES ERVs are enriched for such context-specific errors, we should see significantly more  
41 T>N ERVs at the 5'-GGGT-3' motif than A>N ERVs at the 5'-ACCC-3' and motif. Of the 127,831 ERVs  
42 that occur at this motif, 63,861 were 5'-[A>N]CCC-3' variants, and 63,970 were 5'-GGG[T>N]-3'  
43 variants; this difference was not significant, indicating there is no evidence for an enrichment of T>N  
44 ERVs at this error-prone motif (exact binomial test; P=0.67). Allhoff et al. remark that the variants called  
45 at error-prone positions tended to have low base quality scores as well as significant strand bias, both  
46 of which are detectable with standard filtering protocols<sup>6</sup>. We therefore assume that most motif-specific  
47 errors are efficiently filtered by the default strand-bias and quality filters used in our variant calling

48 pipeline, and any undetected errors have a negligible impact on our calculation of relative mutation  
49 rates and downstream analyses.

### 50 **3.2. Mapping error**

51 We expect the majority of ERVs in our data are mapped with high confidence, as the pre-filtering steps  
52 in our variant calling pipeline remove sites occurring on reads with average phred-scaled mapping  
53 quality score (MQ) <20 and/or where more than 10% of reads were ambiguously mapped (MQ0>10).  
54 This filtering strategy is similar to the filters employed by other large-scale sequencing projects that  
55 have demonstrated well-controlled error rates among singleton calls<sup>4,7</sup>. Because mapping errors are  
56 more likely to occur in highly-repetitive regions, such as centromeric and pericentromeric loci<sup>8</sup>, including  
57 these regions in our analyses might bias our estimates of motif-specific mutation rates and/or the  
58 impact of genomic features. However, excluding these regions entirely might have detrimental side  
59 effects: dropping ERVs in these regions will reduce the precision of our estimates, and removing hard-  
60 to-map regions might preclude our ability to assess mutation patterns unique to these regions, as they  
61 may have many levels of heterogeneous overlap with genomic features.

62 To determine if excluding repeat-rich regions might be necessary, we compared the 7-mer relative  
63 mutation rates estimated from the full, unfiltered set of ERVs with 7-mer rates estimated if we only  
64 count ERVs and reference motifs within the 1000 Genomes strict accessibility mask, which delineates  
65 the most uniquely mappable regions of the genome (covering ~72% of non-N bases). These two sets of  
66 estimates were very well-correlated: within-type correlations were >0.96, indicating the estimated rates  
67 were highly consistent regardless of whether hard-to-map regions were removed (**Supplementary Fig.**  
68 **6a**). Moreover, subtypes with larger differences between the two estimates tended to have fewer ERVs  
69 (**Supplementary Fig. 6b**), suggesting that most observed discrepancies might simply be an artifact of  
70 reduced precision among rare mutation classes.

71 When we applied the masked rates to predict the set of *de novo* mutations, we found these estimates  
72 had worse predictive performance than the unmasked estimates (**Table 1**). This result leads us to  
73 conclude that aggressively filtering for the highest-confidence call set comes at a cost of substantially

74 reducing the precision of the relative mutation rate estimates, and potentially causing greater bias by  
75 ignoring the information captured by ERVs in the masked regions. Although we cannot entirely exclude  
76 the possibility of mapping error biases among the unmasked estimates, the benefits of having more  
77 numerous singletons across more contiguous genomic regions in the unmasked data outweigh the  
78 concerns about errors caused by poor mapping quality.

### 79 3.3. Mispolarization of ERVs

80 While most singletons in the BRIDGES sample are the true derived allele, population genetic theory  
81 suggests that  $1/N=0.014\%$  of singletons in a sample are the ancestral allele, and hence subject to the  
82 same evolutionary biases we wish to avoid. These mispolarized singletons may be hard to detect, as  
83 we expect  $\sim 0.25\%$  of all singletons to carry the same allele in human and chimpanzee due to parallel  
84 mutations that have occurred since splitting from a common ancestor. Intuitively, these parallel  
85 mutations are especially likely to occur in hypermutable loci, so removing the  $0.25\%$  “ancestral” alleles  
86 created by parallel mutation may create a bigger bias than including the  $0.015\%$  truly ancestral alleles.

87 To understand the impact of removing all putatively ancestral alleles, we used an ancestral genome  
88 inferred by 6-way primate alignment<sup>9</sup> to annotate each allele with the putative ancestral state. We  
89 identified 363,705 singletons ( $\sim 1\%$  of all singletons) where the alternative allele was the same as the  
90 ancestral allele, and recalculated 7-mer relative mutation rates after removing these putatively  
91 mispolarized singletons. We found that this polarization filter did not strongly affect estimated rates:  
92 across all types combined as well as within each type, the rates before and after removal of these sites  
93 were nearly perfectly correlated (Spearman’s  $r>0.999$ ). Further, we found that only 9 of the 24,576 7-  
94 mer rates differed significantly after applying this filter, and the re-estimated rates for these 9 subtypes  
95 differed from the original rates by no more than 10%. More importantly, 8 of these 9 subtypes were  
96 hypermutable CpG>TpG subtypes, consistent with our intuition that many putatively mispolarized sites  
97 are in fact parallel mutations in the human and chimpanzee lineages.

98 As a final analysis of the potential effects of mispolarization on our estimates, we applied these filtered  
99 rates to predict the GoNL/ITMI *de novo* mutations in the same logistic regression framework used to

100 compare other estimation strategies. Goodness-of-fit statistics indicated that the filtered rates predicted  
101 *de novo* mutations comparably to the 7-mer rates estimated without the polarization filter: comparing  
102 the AIC between type-specific models, only two had differences in AIC greater than 10: A>T types were  
103 predicted slightly better by the filtered rates ( $\Delta\text{AIC}=16$ ), but CpG>TpG types were predicted better by  
104 the unfiltered rates ( $\Delta\text{AIC}=22$ ), suggesting the accuracy of the filtered rates is affected by parallel  
105 mutations at these hypermutable sites. All other types showed negligible differences in AIC ( $\Delta\text{AIC} < 7$ ).  
106 In addition, neither set of estimates resulted in consistently lower AIC among the other 7 mutation  
107 types, further supporting that filtering putatively mispolarized singletons does not lead to inherently  
108 more accurate results. Given this lack of consistent improvement, results presented for all subsequent  
109 analyses use the full set of 35.6 million ERVs without applying a polarization filter.

#### 110 **Supplementary Note 4. Curation of MAC10+-derived mutation rate estimates**

111 A potential concern with comparisons between our ERV-derived mutation rate estimates and  
112 Aggarwala & Voight's 1000G-based estimates<sup>10</sup> is that discrepancies might be partially attributable to  
113 technical differences between the two samples, not necessarily because the 1000G estimates are  
114 based on ancestrally older SNVs. For a more direct comparison, we curated a set of higher-frequency  
115 SNVs found in the BRIDGES data, removing the possibility that the dissimilar estimates are a result of  
116 differences in sequencing platform, variant calling, QC methods, and sampled individuals.

117 Aggarwala & Voight's mutation rate estimates are based on 7,051,667 intergenic variants observed in  
118 N=379 Europeans from the 1000 Genomes Phase I study<sup>10</sup>. Aggarwala & Voight do not state the exact  
119 site frequency spectrum for the European intergenic variants, but claim 26% of intergenic variants in the  
120 1000G Phase I African sample are singletons or doubletons<sup>10</sup>. Thus, it is reasonable to assume that  
121 >80% of European intergenic SNVs in the 1000G data occur at a frequency greater than  
122  $1/(379*2)=0.0013$  (i.e., the sample MAF of a singleton in the 1000G sample). To obtain SNVs in the  
123 BRIDGES sample in a frequency range comparable to this, we selected all SNVs with a minor allele  
124 count  $\geq 10$  (MAF $\geq 0.0014$ ). We identified 12,088,037 such variants in our data, and proceeded to use  
125 these MAC10+-derived relative mutation rates as a proxy for the 1000 Genomes model.

## 126 **Supplementary Note 5. Potential mechanisms for NTTAAAA hypermutability**

127 Our finding of a 3-fold depletion of NTT[A>T]AAA motifs in DNase hypersensitive sites provides an  
128 excellent example of how our results can be leveraged to better understand the origins of certain  
129 mutation patterns. We identify two possible mechanisms that might explain the context-dependent  
130 mutation probabilities of this mutation subtype. As described in the main text, L1 EN nicking activity has  
131 been shown to vary according to the nucleosomal context of its target motifs, usually occurring at a  
132 higher rate in nucleosome-free DNA, but in some cases actually decreasing in nucleosome-free DNA<sup>11</sup>.  
133 Therefore, under the L1 EN model, it is possible to see either a positive or negative association  
134 between NTTAAAA mutability and DHS.

135 Slipped-strand mispairing, also known as replication slippage, is another plausible hypothesis for the  
136 hypermutability of this motif<sup>10</sup>. Because the nucleosomal architecture is disrupted ahead of the  
137 replication fork<sup>12</sup>, and reassembled almost immediately thereafter<sup>13</sup>, nascent DNA containing  
138 unresolved lesions that is packaged in nucleosomes could be inaccessible to mismatch repair  
139 machinery, thus preserving any errors caused by slippage. In this case, it is also possible to see a  
140 negative association between NTTAAAA mutability and DHS. This slippage mechanism, however,  
141 appears to be unlikely for the following reasons. First, replication slippage inherently results in short  
142 insertions or deletions rather than point mutations. Mapping error could potentially cause an insertion or  
143 deletion to be falsely identified as a single-nucleotide variant, but such errors would need to be  
144 extremely prevalent in our data (and also context-dependent) in order to observe a 3-fold depletion of  
145 these singletons in DHS. Given the quality metrics we report for the BRIDGES singletons, it seems  
146 unlikely that these results are purely a technical artifact. Furthermore, if slippage were the primary  
147 mechanism, we would expect other motifs ending in poly-A 4-mers to also show an inverse association  
148 with DHS. Among the 13 NNNAAAA subtypes whose mutability is significantly associated with DHS,  
149 only five are inversely associated, three of which are NNTAAAA motifs (i.e., conforming closely to the  
150 canonical target for L1 EN nicking activity). The other eight subtypes all show *higher* mutation rates in  
151 DHS, which conflicts with the proposed slippage+chromatinization mechanism.



152 **Acknowledgements**

153 The BRIDGES study was supported by R01 MH094145 to Michael Boehnke and Richard M. Myers and  
154 U01 MH105653 to Michael Boehnke. The collection and storage of cases and controls from the Centre  
155 for Addiction and Mental Health (CAMH) in Toronto and from the Institute of Psychiatry, Psychology  
156 and Neuroscience (IoPPN), King's College London in London, U.K. was supported by funding from  
157 GlaxoSmithKline, from the Canadian Institutes of Health Research to John B. Vincent, MOP-172013  
158 (CAMH), and funding from the National Institute for Health Research (NIHR) Biomedical Research  
159 Centre at South London and Maudsley NHS Foundation Trust and King's College London (IoPPN). The  
160 views expressed are those of the author(s) and not necessarily those of the UK NHS, the NIHR or the  
161 UK Department of Health. Case and control collection was supported by Heinz C. Prechter Bipolar  
162 Research Fund at the University of Michigan Depression Center to Melvin G. McClinnis (Prechter). Data  
163 and biomaterials were collected for the Systematic Treatment Enhancement Program for Bipolar  
164 Disorder (STEP-BD), a multi-center, longitudinal project selected from responses to RFP #NIMH-98-  
165 DS-0001, "Treatment for Bipolar Disorder" which was led by Gary Sachs and coordinated by  
166 Massachusetts General Hospital in Boston, MA with support from 2N01 MH080001-001. The Genomic  
167 Psychiatric Cohort wishes to acknowledge all of the research participants in this cohort; the study was  
168 supported by U01 MH105641, R01 MH085548, R01MH104964. The MCTFR study was supported  
169 through grants from the National Institutes of Health DA037904, DA024417, DA036216, DA05147,  
170 AA09367, DA024417, HG007022, and HL117626.

## References

1. Costello, M. *et al.* Discovery and characterization of artifactual mutations in deep coverage targeted capture sequencing data due to oxidative DNA damage during sample preparation. *Nucleic Acids Res.* **41**, 1–12 (2013).
2. DePristo, M. A. *et al.* A framework for variation discovery and genotyping using next-generation DNA sequencing data. *Nat. Genet.* **43**, 491–498 (2011).
3. Reppell, M., Boehnke, M. & Zöllner, S. The impact of accelerating faster than exponential population growth on genetic variation. *Genetics* **196**, 819–828 (2014).
4. Lek, M. *et al.* Analysis of protein-coding genetic variation in 60,706 humans. *Nature* **536**, 285–291 (2016).
5. Minoche, A., Dohm, J. & Himmelbauer, H. Evaluation of genomic high-throughput sequencing data generated on Illumina HiSeq and Genome Analyzer systems. *Genome Biol.* **12**, R112 (2011).
6. Allhoff, M. *et al.* Discovering motifs that induce sequencing errors. *BMC Bioinformatics* **14 Suppl 5**, S1 (2013).
7. Walter, K. *et al.* The UK10K project identifies rare variants in health and disease. *Nature* **526**, 82–90 (2015).
8. Horvath, J. E. *et al.* Molecular structure and evolution of an alpha satellite/non-alpha satellite junction at 16p11. *Hum. Mol. Genet.* **9**, 113–23 (2000).
9. McVean, G. A. *et al.* An integrated map of genetic variation from 1,092 human genomes. *Nature* **491**, 56–65 (2012).
10. Aggarwala, V. & Voight, B. F. An expanded sequence context model broadly explains variability in polymorphism levels across the human genome. *Nat. Genet.* **48**, 349–355 (2016).
11. Cost, G. J. Target DNA chromatinization modulates nicking by L1 endonuclease. *Nucleic Acids Res.* **29**, 573–577 (2001).
12. Groth, A., Rocha, W., Verreault, A. & Almouzni, G. Chromatin Challenges during DNA Replication and Repair. *Cell* **128**, 721–733 (2007).
13. Leman, A. R. & Noguchi, E. The replication fork: understanding the eukaryotic replication machinery and the challenges to genome duplication. *Genes (Basel)*. **4**, 1–32 (2013).
14. Kundaje, A. *et al.* Integrative analysis of 111 reference human epigenomes. *Nature* **518**, 317–330 (2015).
15. Koren, A. *et al.* Differential relationship of DNA replication timing to different forms of human mutation and variation. *Am. J. Hum. Genet.* **91**, 1033–1040 (2012).
16. Kong, A. *et al.* Fine-scale recombination rate differences between sexes, populations and individuals. *Nature* **467**, 1099–1103 (2010).
17. Guelen, L. *et al.* Domain organization of human chromosomes revealed by mapping of nuclear lamina interactions. *Nature* **453**, 948–51 (2008).
18. Wu, H., Caffo, B., Jaffee, H. A., Irizarry, R. A. & Feinberg, A. P. Redefining CpG islands using hidden Markov models. *Biostatistics* **11**, 499–514 (2010).

# Supplementary Figures

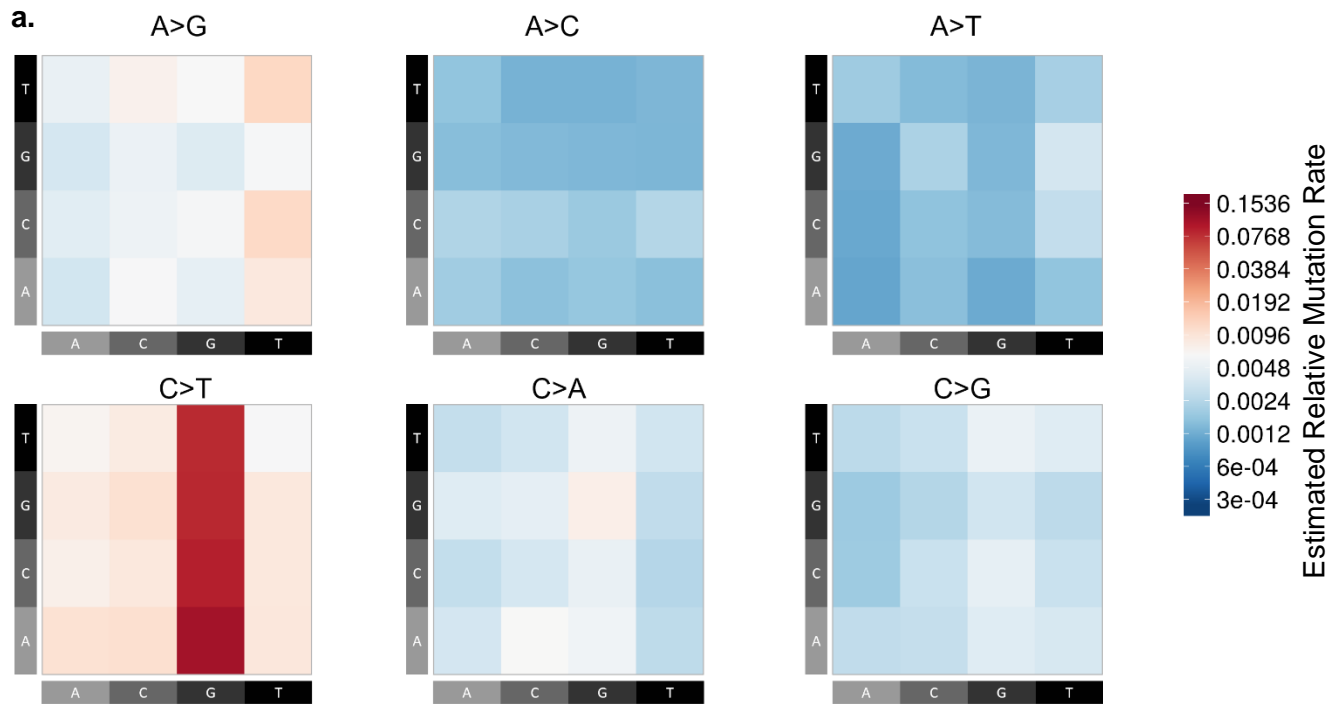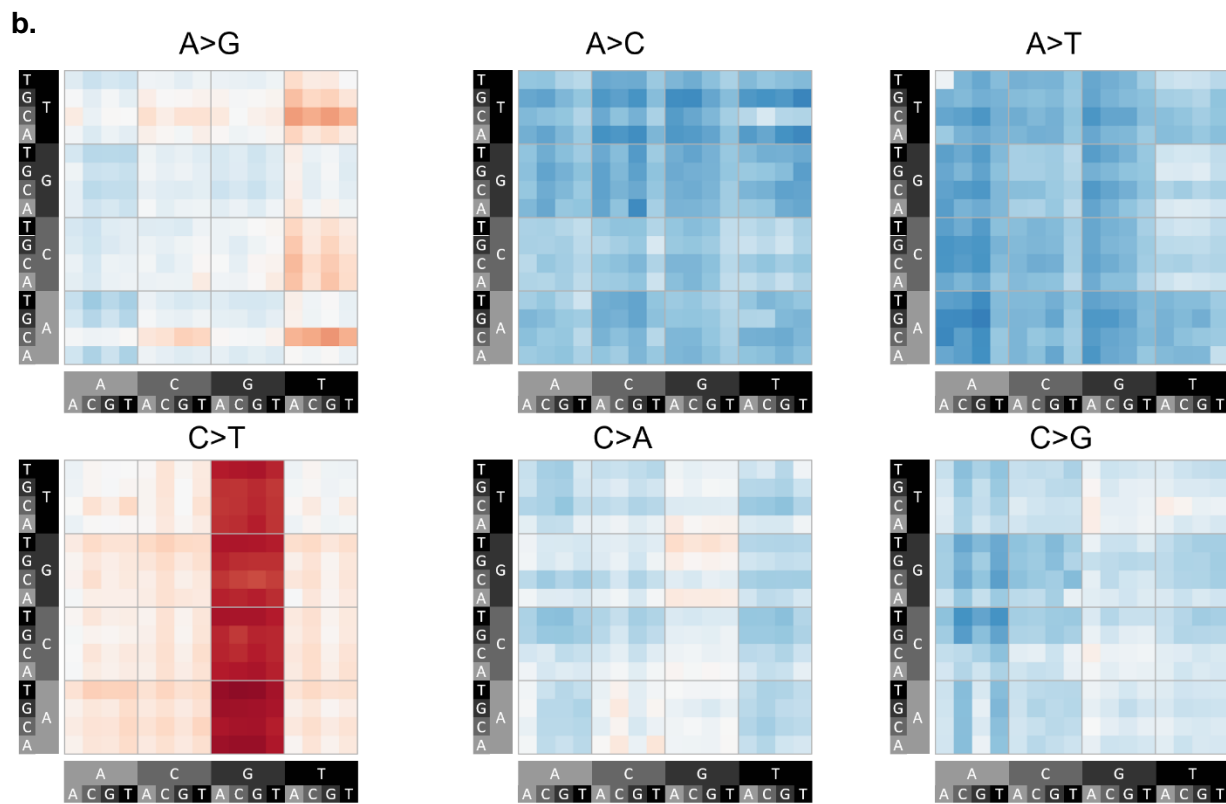

**c.**

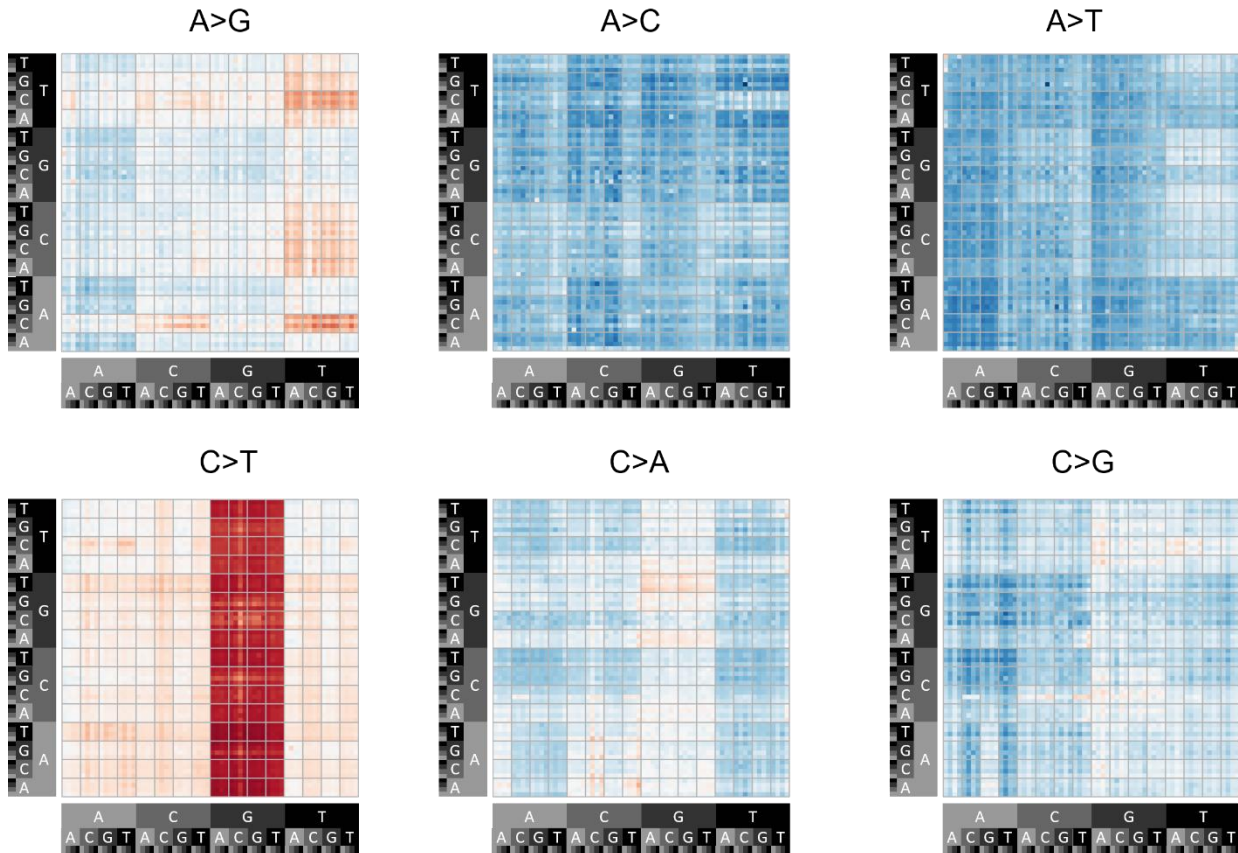

**Supplementary Figure 1** High-resolution heatmaps of relative mutation rates for mutation subtypes up to a 7-mer resolution, estimated from the BRIDGES ERVs. **(a)** estimates for 3-mer mutation subtypes. **(b)** estimates for 5-mer mutation subtypes. **(c)** estimates for 7-mer mutation subtypes. Each cell delineates a subtype defined by the upstream sequence (y-axis) and downstream sequence (x-axis) from the central (mutated) nucleotide.

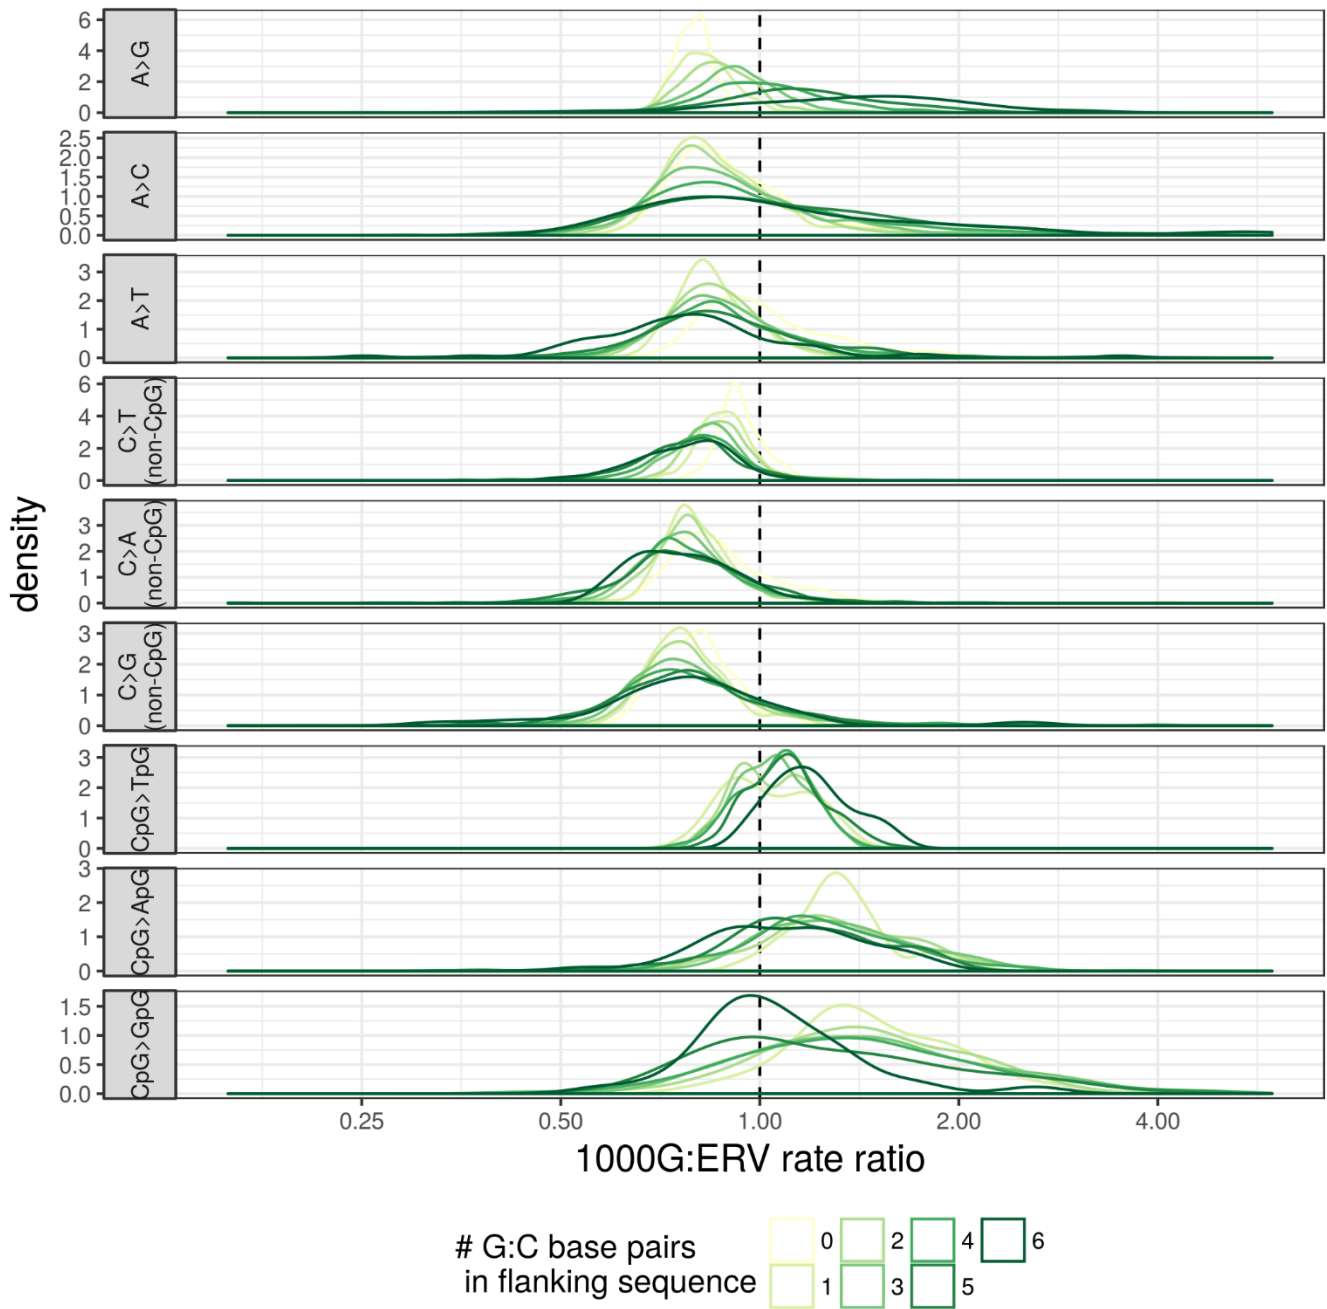

**Supplementary Figure 2** Density plots comparing the distribution of ratios between the 1000G and ERV rate estimates. For each type, we grouped 7-mer subtypes by the number of G:C base pairs in the +/-3 flanking sequence, and plotted the distribution of ratios separately for each of these group. Mass to the right of the dashed line indicates estimated rates tend to be higher in the 1000G data, while mass to the left shows subtypes where estimated rates are higher in the BRIDGES ERV data.

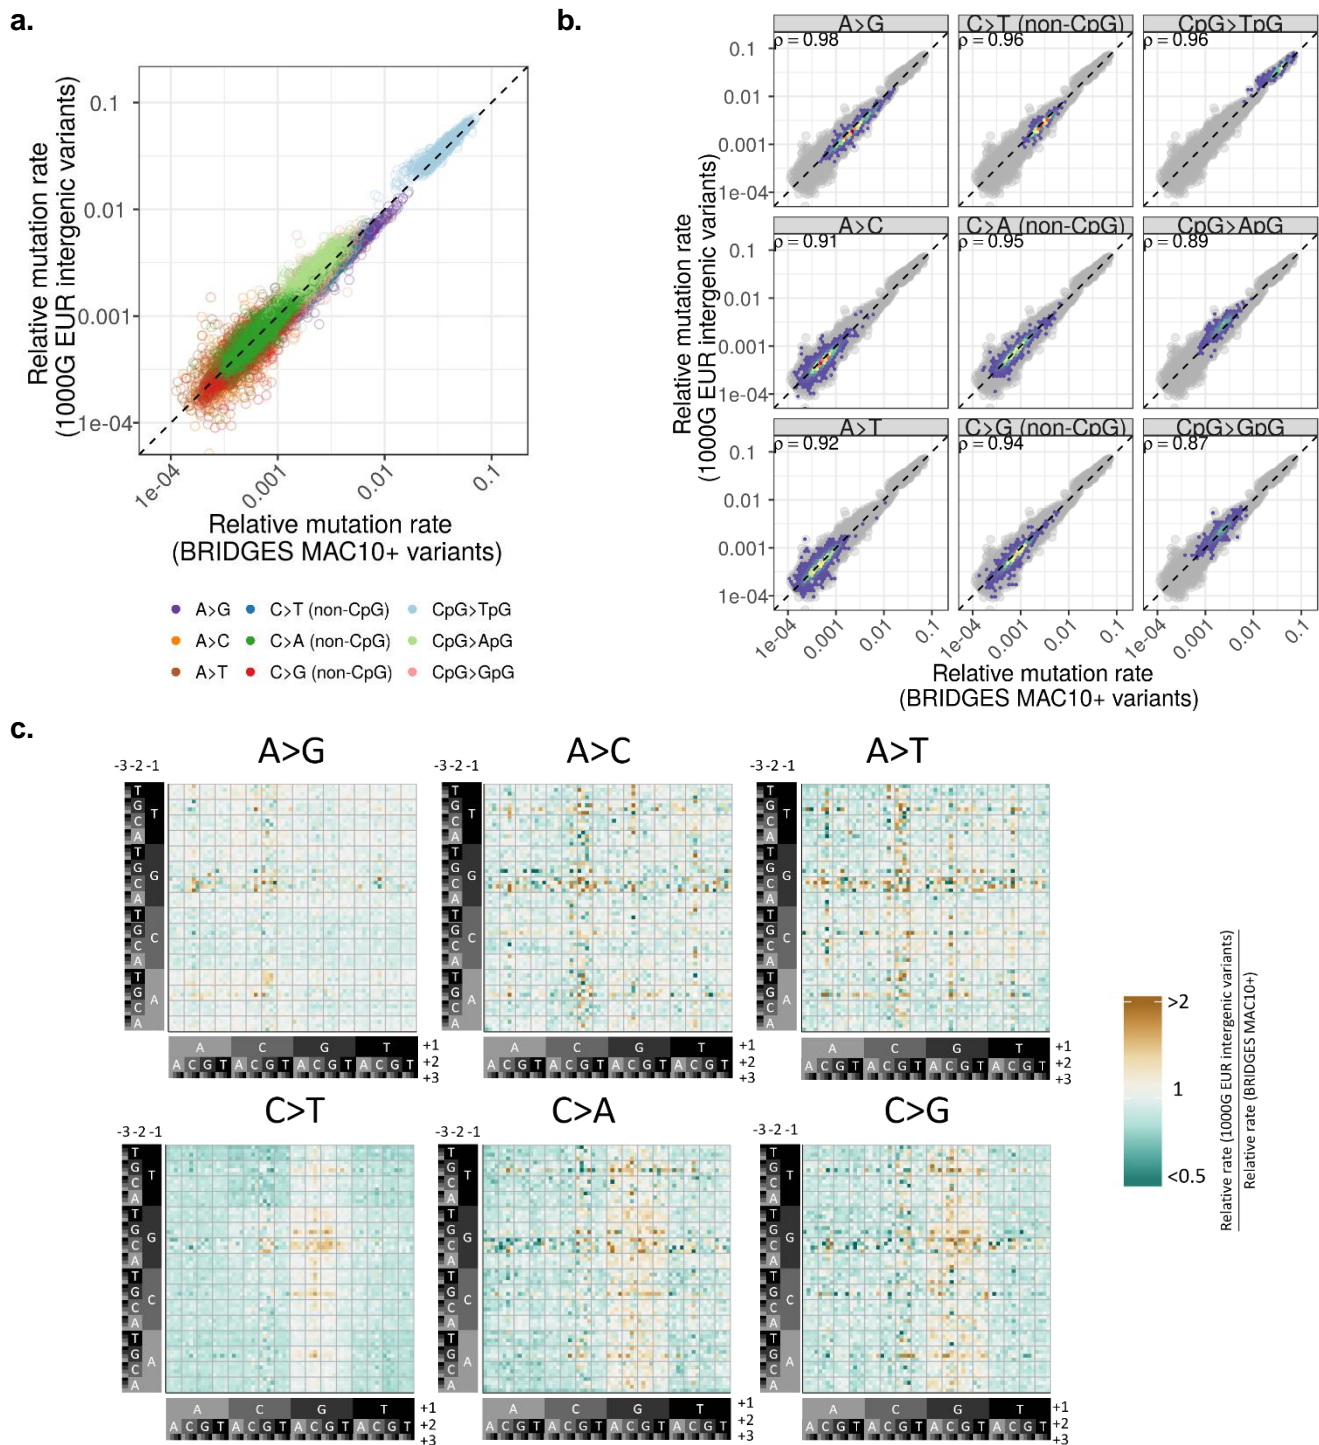

### Supplementary Figure 3

(a) Relationship between 7-mer relative mutation rates estimated using BRIDGES variants with a minor allele count  $\geq 10$  (MAC10+; x-axis), and 7-mer rates calculated from intergenic variants in the European 1000G phase I sample (y-axis) (b) Type-specific 2D-density plots, as situated in the scatterplot of a. The dashed line indicates an expected least-squares regression line if there is no bias present. (c) Heatmap shows ratio between relative mutation rates calculated on MAC10+ variants and 1000G variants for each 7-mer mutation subtype. Subtypes with higher 1000G-derived rates relative to MAC10+-derived rates are shaded gold, and subtypes with lower 1000G-derived rates relative to MAC10+-derived rates are shaded green. 1000G-derived rates shown here are scaled relative to the MAC10+-derived rates.

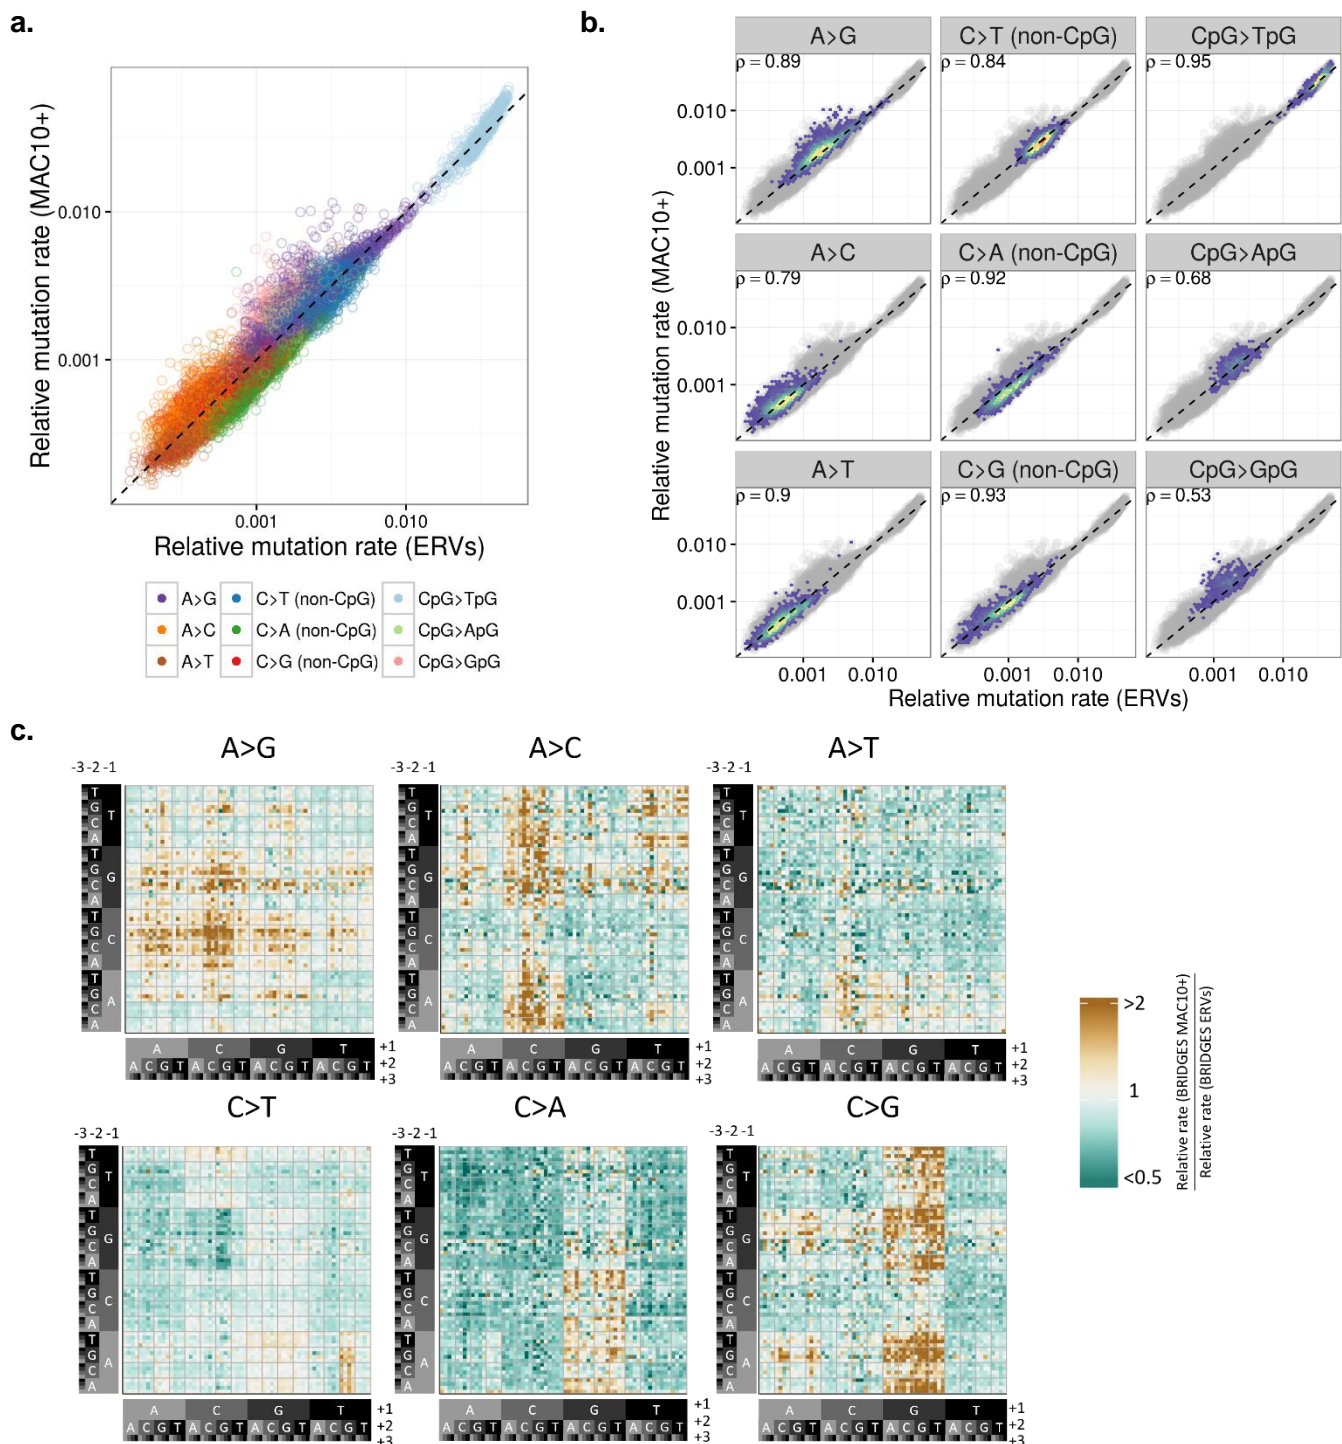

### Supplementary Figure 4

(a) Relationship between 7-mer relative mutation rates estimated using BRIDGES ERVs (x-axis) and variants with a minor allele count  $\geq 10$  (MAC10+; y-axis), after randomly downsampling the ERVs to 12,088,037. (b) Type-specific 2D-density plots, as situated in the scatterplot of a. The dashed line indicates an expected least-squares regression line if there is no bias present. (c) Heatmap shows ratio between relative mutation rates calculated on MAC10+ variants and ERVs for each 7-mer mutation subtype. Subtypes with higher MAC10+-derived rates relative to ERV-derived rates are shaded gold, and subtypes with lower MAC10+-derived rates relative to ERV-derived rates are shaded green.

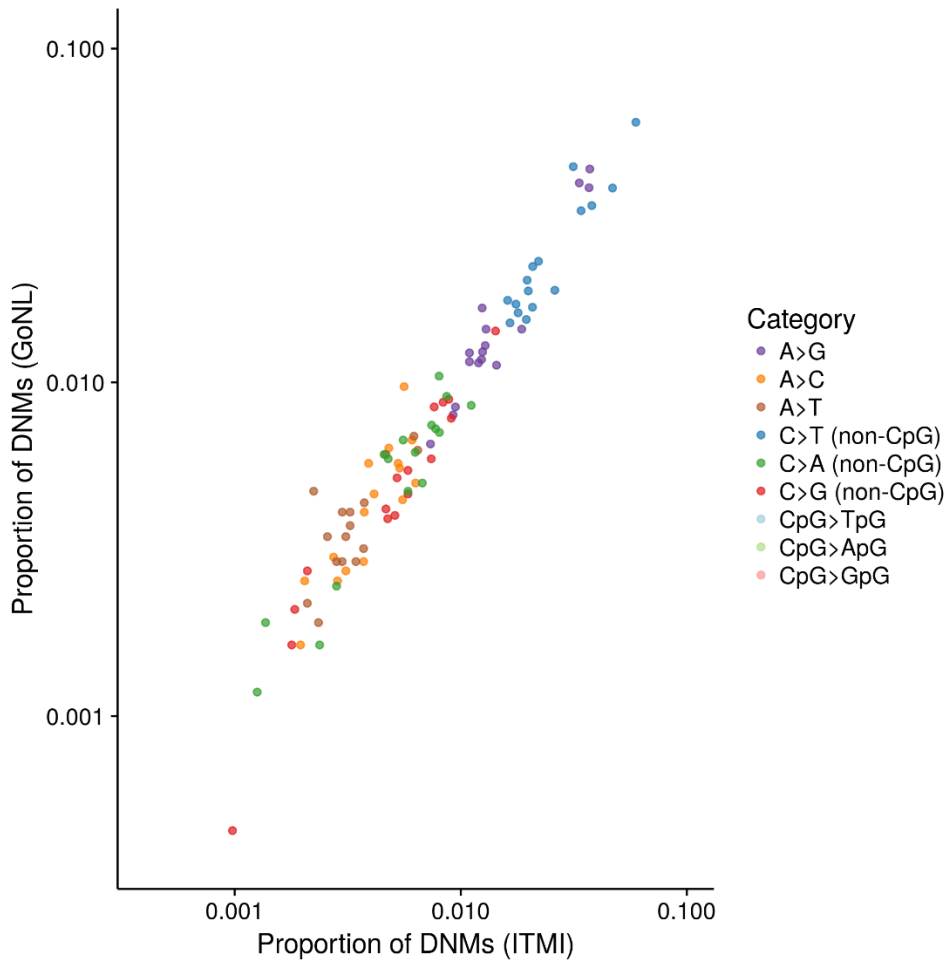

**Supplementary Figure 5** Correlation between 3-mer mutational spectra among *de novo* mutations from the ITMI (x axis) GoNL (y axis) trio sequencing studies. In each study, we calculated the proportion of all mutations within each of the 96 3-mer subtypes.



**a.**

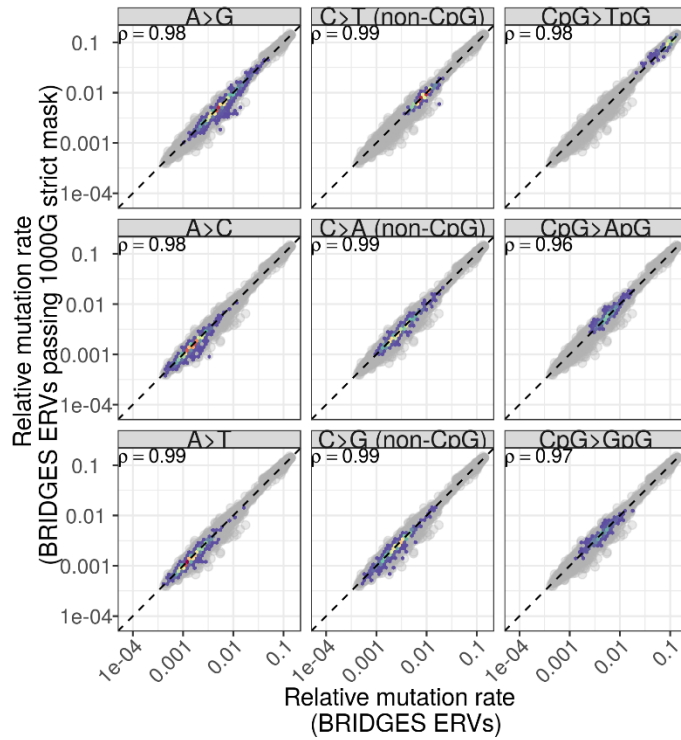

**b.**

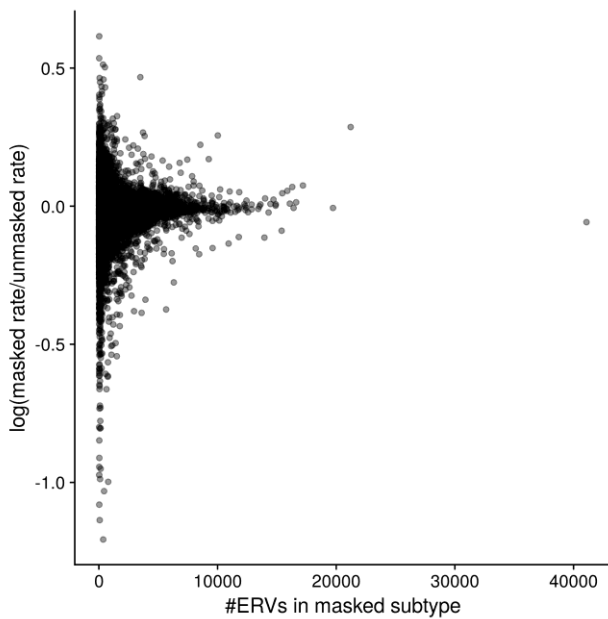

**Supplementary Figure 6 (a)** relationship between masked and unmasked 7-mer relative mutation rate estimates, separated by type. **(b)** relationship between number of ERVs per subtype (x axis) and discordance between the masked and unmasked rates, measured as the log ratio between the estimates (y axis).

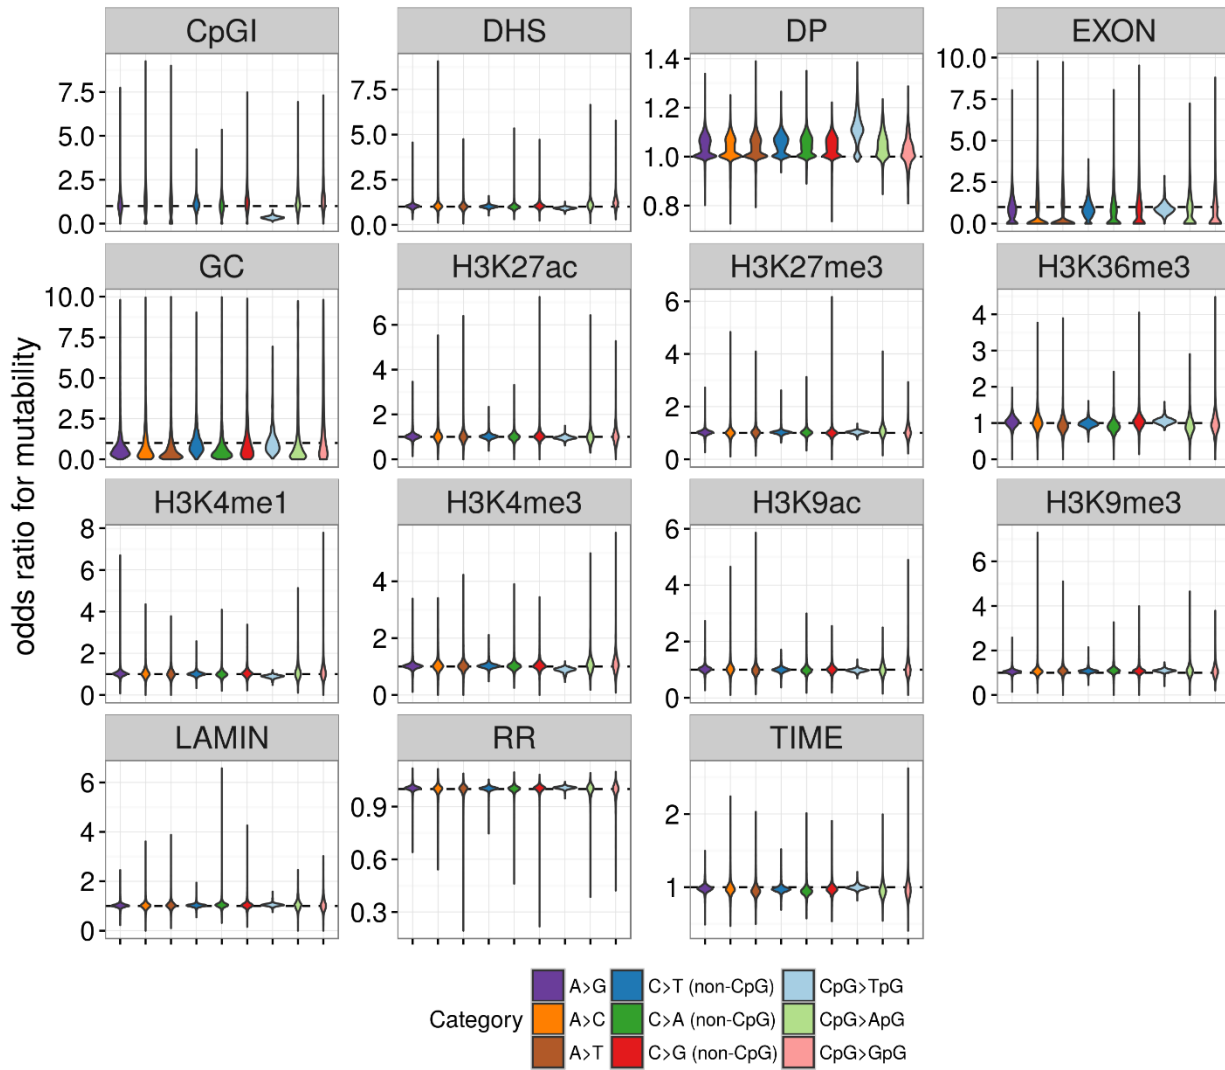

**Supplementary Figure 7** Distributions of effect sizes (including non-significant effects) on mutability for the 14 genomic features (and depth of sequencing) considered in the logistic regression model. For each feature, we plotted the empirical distributions of these subtype-specific odds ratios for each basic mutation type. \*Replication timing is coded with negative values indicating later replicating regions, so an OR<1 means mutation rate increases in late-replicating regions. Note that effects in CpG islands are shown on a wider scale than other features.

## Supplementary Tables

**Supplementary Table 1 Quality comparison between filtered partitions of BRIDGES singletons**

| Partition                              | # Singletons | Ts/Tv ratio | %dbSNP (b142) | % of Full Set |
|----------------------------------------|--------------|-------------|---------------|---------------|
| Full Set                               | 35,574,417   | 2.00        | 17.4          | 100           |
| Filter 2 (MQ>56)                       | 33,550,098   | 2.01        | 17.3          | 94            |
| Filter 3 (passed 1000G strict mask)    | 26,810,791   | 1.97        | 17.5          | 75            |
| All Filters (MQ>56, 1000G strict mask) | 16,535,856   | 2.00        | 17.6          | 46            |

**Supplementary Tables 2a-2d Relative mutation rate estimates for 1-mers, 3-mers, 5-mers, and 7-mers**

[see separate spreadsheet, table\_S2\_K-mer\_relative\_rates.xlsx]

Each table contains data used to calculate relative mutation rates for K-mers of a given length. Each row in the table contains the following columns: 1) basic mutation type; 2) K-mer motif corresponding to a reference base A or C at the central mutated position (the reverse complement of each motif, corresponding to reference base T or G is given in parentheses); 3) number of singletons observed in the BRIDGES data of the K-mer subtype defined by columns 1 and 2; 4) total number of times the motif in column 2 is observed in the reference genome; 5) relative mutation rate of singletons in that subtype (column 3 divided by column 4). For 7-mer subtypes (Supplementary Table 2d), we include five additional columns: 6) number of singletons in that subtype that pass the 1000G strict accessibility mask; 7) number of motifs of that subtype that pass the 1000G strict accessibility mask; 8) relative mutation rate of the masked data (column 6 divided by column 7); 9) number of MAC10+ variants observed in the BRIDGES data of that subtype; 10) relative mutation rate of MAC10+ variants of that subtype (column 9 divided by column 4).

**Supplementary Table 3** t-tests for differences in mean 1000G/ERV ratio of GC-poor vs. GC-rich 7-mer motifs

| Type          | Mean 1000G/ERV ratio<br>( $\leq 3$ C/G bases) | Mean 1000G/ERV ratio<br>( $\geq 4$ C/G bases) | P-value   |
|---------------|-----------------------------------------------|-----------------------------------------------|-----------|
| A>C           | 0.97                                          | 1.12                                          | 8.00e-30  |
| A>G           | 1.00                                          | 1.28                                          | 2.37e-161 |
| A>T           | 0.89                                          | 0.89                                          | 0.81      |
| C>A (non-CpG) | 0.76                                          | 0.72                                          | 2.61e-09  |
| C>G (non-CpG) | 0.89                                          | 0.93                                          | 2.98e-04  |
| C>T (non-CpG) | 0.93                                          | 0.85                                          | 1.75e-39  |
| CpG>ApG       | 1.15                                          | 0.96                                          | 4.97e-22  |
| CpG>GpG       | 1.46                                          | 1.33                                          | 2.80e-04  |
| CpG>TpG       | 1.02                                          | 0.98                                          | 1.01e-09  |

For each mutation subtype, we calculated the ratio between 1000G-derived and ERV-derived relative mutation rates. Then, for each of the 9 basic types, we grouped 7-mer subtypes into low C/G subtypes ( $\leq 3$  C/G bases in the +/-3 flanking positions) and high C/G subtypes ( $\geq 4$  C/G bases in the +/-3 flanking positions) and performed t-tests for differences in the mean 1000G/ERV ratios of these two groups.

**Supplementary Table 4 Comparison of observed and simulated goodness-of-fit for *de novo* prediction models under different sized non-mutated backgrounds**

| Model                          | Observed |                | Simulated |                  | Background size |
|--------------------------------|----------|----------------|-----------|------------------|-----------------|
|                                | AIC      | R <sup>2</sup> | AIC       | R <sup>2</sup> * |                 |
| 1-mers                         | 292542   | .109           | 272925    | .185             | 500,000         |
| 3-mers                         | 284889   | .139           | 241863    | .299             |                 |
| 5-mers                         | 282995   | .146           | 239672    | .307             |                 |
| 7-mers                         | 282491   | .148           | 238967    | <b>.310</b>      |                 |
| 7-mers (BRIDGES MAC10+ SNVs)   | 283599   | .144           | 240434    | .304             |                 |
| 7-mers (1000G intergenic SNVs) | 284764   | .139           | 241724    | .300             |                 |
| 1-mers                         | 353896   | .088           | 344108    | .117             | 1,000,000       |
| 3-mers                         | 343716   | .118           | 317322    | .197             |                 |
| 5-mers                         | 341778   | .124           | 315400    | .202             |                 |
| 7-mers                         | 341295   | .126           | 314760    | <b>.204</b>      |                 |
| 7-mers (BRIDGES MAC10+ SNVs)   | 342886   | .121           | 316791    | .198             |                 |
| 7-mers (1000G intergenic SNVs) | 344003   | .118           | 317953    | .195             |                 |
| 1-mers                         | 416998   | .072           | 414016    | .080             | 2,000,000       |
| 3-mers                         | 404738   | .102           | 392367    | .132             |                 |
| 5-mers                         | 402853   | .107           | 390698    | .136             |                 |
| 7-mers                         | 402375   | .108           | 390051    | <b>.138</b>      |                 |
| 7-mers (BRIDGES MAC10+ SNVs)   | 404378   | .103           | 392509    | .132             |                 |
| 7-mers (1000G intergenic SNVs) | 405523   | .100           | 393741    | .129             |                 |
| 1-mers                         | 454267   | .066           | 452950    | .069             | 3,000,000       |
| 3-mers                         | 441042   | .095           | 434665    | .109             |                 |
| 5-mers                         | 439153   | .099           | 433243    | .112             |                 |
| 7-mers                         | 438700   | .100           | 432517    | <b>.114</b>      |                 |
| 7-mers (BRIDGES MAC10+ SNVs)   | 441059   | .095           | 435270    | .108             |                 |
| 7-mers (1000G intergenic SNVs) | 442181   | .092           | 436443    | .105             |                 |

\*The simulated R<sup>2</sup> of the best possible model for each background size, indicated in bold, represents the optimal performance we can expect.

**Supplementary Table 5 Comparison of model AIC considering only *de novo* mutations from the GoNL or ITMI study**

| Model                          | GoNL DNMs (11,020) | ITMI DNMs (35k) |
|--------------------------------|--------------------|-----------------|
| 1-mers                         | 114945             | 288707          |
| 3-mers                         | 111952             | 280025          |
| 5-mers                         | 111507             | 278542          |
| 7-mers                         | 111381             | 278201          |
| 7-mers (BRIDGES MAC10+ SNVs)   | 111913             | 279580          |
| 7-mers (1000G intergenic SNVs) | 112185             | 280401          |

Models fitted to a background of 1 million non-mutated sites, as described previously. Note that the difference in AIC between the two datasets is due to the difference in number of DNMs, and is not comparable between the GoNL and ITMI studies; what matters here is the rank order

**Supplementary Table 6** Type-specific model fit statistics for mutation rate estimation strategies applied to the *de novo* testing data. Each type is shown in a sub-table, with the number of *de novo* mutations and non-mutated sites used in the partitioned testing data indicated in the subheading.

**A>C (2920 *de novo* mutations; 198481 non-mutated sites)**

| Model                             | Nagelkerke's R <sup>2</sup> | AIC   |
|-----------------------------------|-----------------------------|-------|
| 3-mers                            | 0.002                       | 32831 |
| 5-mers                            | 0.007                       | 32701 |
| 7-mers                            | 0.009                       | 32641 |
| 7-mers+features                   | 0.009                       | 32636 |
| 7-mers (downsampled BRIDGES ERVs) | 0.008                       | 32670 |
| 7-mers (BRIDGES MAC10+ SNVs)      | 0.003                       | 32809 |
| 7-mers (1000G intergenic SNVs)    | 0.004                       | 32775 |

**A>G (11400 *de novo* mutations; 198793 non-mutated sites)**

| Model                             | Nagelkerke's R <sup>2</sup> | AIC   |
|-----------------------------------|-----------------------------|-------|
| 3-mers                            | 0.039                       | 91474 |
| 5-mers                            | 0.065                       | 89455 |
| 7-mers                            | 0.068                       | 89212 |
| 7-mers+features                   | 0.069                       | 89111 |
| 7-mers (downsampled BRIDGES ERVs) | 0.064                       | 89505 |
| 7-mers (BRIDGES MAC10+ SNVs)      | 0.061                       | 89732 |
| 7-mers (1000G intergenic SNVs)    | 0.061                       | 89746 |

**A>T (2455 *de novo* mutations; 198320 non-mutated sites)**

| Model                             | Nagelkerke's R <sup>2</sup> | AIC   |
|-----------------------------------|-----------------------------|-------|
| 3-mers                            | 0.015                       | 28130 |
| 5-mers                            | 0.016                       | 28114 |
| 7-mers                            | 0.016                       | 28106 |
| 7-mers+features                   | 0.016                       | 28105 |
| 7-mers (downsampled BRIDGES ERVs) | 0.007                       | 28350 |
| 7-mers (BRIDGES MAC10+ SNVs)      | 0.001                       | 28498 |
| 7-mers (1000G intergenic SNVs)    | 0.003                       | 28463 |

**non-CpG C>A (3620 *de novo* mutations; 128765 non-mutated sites)**

| <b>Model</b>                      | <b>Nagelkerke's R<sup>2</sup></b> | <b>AIC</b> |
|-----------------------------------|-----------------------------------|------------|
| 3-mers                            | 0.012                             | 35362      |
| 5-mers                            | 0.022                             | 35039      |
| 7-mers                            | 0.03                              | 34794      |
| 7-mers+features                   | 0.032                             | 34743      |
| 7-mers (downsampled BRIDGES ERVs) | 0.029                             | 34823      |
| 7-mers (BRIDGES MAC10+ SNVs)      | 0.024                             | 35000      |
| 7-mers (1000G intergenic SNVs)    | 0.027                             | 34892      |

**non-CpG C>G (3561 *de novo* mutations; 128746 non-mutated sites)**

| <b>Model</b>                      | <b>Nagelkerke's R<sup>2</sup></b> | <b>AIC</b> |
|-----------------------------------|-----------------------------------|------------|
| 3-mers                            | 0.006                             | 35889      |
| 5-mers                            | 0.018                             | 35490      |
| 7-mers                            | 0.024                             | 35321      |
| 7-mers+features                   | 0.024                             | 35321      |
| 7-mers (downsampled BRIDGES ERVs) | 0.023                             | 35350      |
| 7-mers (BRIDGES MAC10+ SNVs)      | 0.019                             | 35480      |
| 7-mers (1000G intergenic SNVs)    | 0.018                             | 35489      |

**non-CpG C>T (10321 *de novo* mutations; 128774 non-mutated sites)**

| <b>Model</b>                      | <b>Nagelkerke's R<sup>2</sup></b> | <b>AIC</b> |
|-----------------------------------|-----------------------------------|------------|
| 3-mers                            | 0.005                             | 79879      |
| 5-mers                            | 0.012                             | 79502      |
| 7-mers                            | 0.014                             | 79379      |
| 7-mers+features                   | 0.014                             | 79353      |
| 7-mers (downsampled BRIDGES ERVs) | 0.013                             | 79395      |
| 7-mers (BRIDGES MAC10+ SNVs)      | 0.012                             | 79487      |
| 7-mers (1000G intergenic SNVs)    | 0.013                             | 79434      |

**CpG>ApG (304 *de novo* mutations; 6108 non-mutated sites)**

| <b>Model</b>                      | <b>Nagelkerke's R<sup>2</sup></b> | <b>AIC</b> |
|-----------------------------------|-----------------------------------|------------|
| 3-mers                            | 0.014                             | 2788       |
| 5-mers                            | 0.024                             | 2767       |
| 7-mers                            | 0.027                             | 2763       |
| 7-mers+features                   | 0.029                             | 2761       |
| 7-mers (downsampled BRIDGES ERVs) | 0.025                             | 2763       |
| 7-mers (BRIDGES MAC10+ SNVs)      | 0.022                             | 2771       |
| 7-mers (1000G intergenic SNVs)    | 0.025                             | 2762       |

**CpG>GpG (270 *de novo* mutations; 6292 non-mutated sites)**

| <b>Model</b>                      | <b>Nagelkerke's R<sup>2</sup></b> | <b>AIC</b> |
|-----------------------------------|-----------------------------------|------------|
| 3-mers                            | 0.013                             | 2560       |
| 5-mers                            | 0.015                             | 2557       |
| 7-mers                            | 0.022                             | 2545       |
| 7-mers+features                   | 0.026                             | 2538       |
| 7-mers (downsampled BRIDGES ERVs) | 0.015                             | 2556       |
| 7-mers (BRIDGES MAC10+ SNVs)      | 0.015                             | 2556       |
| 7-mers (1000G intergenic SNVs)    | 0.011                             | 2564       |

**CpG>TpG (6960 *de novo* mutations; 6289 non-mutated sites)**

| <b>Model</b>                      | <b>Nagelkerke's R<sup>2</sup></b> | <b>AIC</b> |
|-----------------------------------|-----------------------------------|------------|
| 3-mers                            | 0.011                             | 20321      |
| 5-mers                            | 0.02                              | 20232      |
| 7-mers                            | 0.025                             | 20173      |
| 7-mers+features                   | 0.06                              | 19777      |
| 7-mers (downsampled BRIDGES ERVs) | 0.024                             | 20182      |
| 7-mers (BRIDGES MAC10+ SNVs)      | 0.027                             | 20151      |
| 7-mers (1000G intergenic SNVs)    | 0.027                             | 20148      |



**Supplementary Table 7 Genomic features used in mutation models**

| <b>Feature</b>                                                 | <b>Source</b>                                                                   | <b>Cell Type</b>                               | <b>Resolution</b>                      |
|----------------------------------------------------------------|---------------------------------------------------------------------------------|------------------------------------------------|----------------------------------------|
| H3K4me1, H3K4me3, H3K9ac, H3K9me3, H3K27ac, H3K27me3, H3K36me3 | Roadmap Epigenomics Project <sup>14</sup>                                       | Peripheral Blood Mononuclear Primary Cells     | 1bp (inside vs. outside of broad peak) |
| Replication timing                                             | Koren et al., 2012 <sup>15</sup>                                                | Lymphoblastoid                                 | 1kb window                             |
| Recombination rate                                             | Kong et al., 2010 <sup>16</sup><br>(deCODE sex-averaged recombination rate map) | --                                             | 10kb window                            |
| Lamin B1 domains                                               | Guelen et al., 2008 <sup>17</sup>                                               | Tig3ET normal human embryonic lung fibroblasts | 1bp (inside vs. outside of LAD)        |
| DNase hypersensitivity sites                                   | ENCODE                                                                          | multiple                                       | 1bp (inside vs. outside of DHS region) |
| Exonic site                                                    | RefSeq gene database                                                            | --                                             | 1bp (inside vs. outside of exon)       |
| CpG island                                                     | Wu et al., 2010 <sup>18</sup>                                                   | --                                             | 1bp (inside vs. outside of CpG island) |
| % GC content                                                   | Calculated from reference genome                                                | --                                             | 10kb                                   |

A script to download the exact external data files used in this paper is available at <https://github.com/carjed/smaug-genetics>

## **Supplementary Table 8 Parameter estimates for genomic features model**

[see separate spreadsheet, table\_S8\_feature\_parameter\_estimates.xlsx]

This table contains effect size estimates and standard errors of 16 parameters (14 features, plus intercept and read depth) for each of the 24,396 7-mer subtypes with at least 20 singletons in the BRIDGES data.

**Supplementary Table 9 Chi-squared tests for enrichment or depletion of *de novo* mutations occurring in feature-associated subtypes**

| Feature                            | Expected direction of effect | <i>de novo</i> relative mutation rate |                              | p-value          |
|------------------------------------|------------------------------|---------------------------------------|------------------------------|------------------|
|                                    |                              | <sup>a</sup> Inside feature           | <sup>b</sup> Outside feature |                  |
| H3K9me3 <sup>†</sup>               | Increased                    | 1.98E-05                              | 1.73E-05                     | <b>4.87E-05</b>  |
| High Recombination rate (> 2)      | Increased                    | 3.66E-05                              | 3.43E-05                     | 0.18             |
| H3K27me3 <sup>†</sup>              | Decreased                    | 5.44E-06                              | 3.14E-06                     | 0.99             |
| H3K27ac                            | Decreased                    | 1.22E-04                              | 1.23E-04                     | 0.50             |
| Exons                              | Decreased                    | 1.20E-04                              | 8.66E-05                     | 0.99             |
| H3K4me1                            | Decreased                    | 1.10E-04                              | 1.40E-04                     | <b>1.84E-10</b>  |
| H3K4me3 <sup>†</sup>               | Decreased                    | 1.00E-04                              | 1.50E-04                     | <b>4.92E-23</b>  |
| H3K9ac <sup>†</sup>                | Decreased                    | 1.49E-05                              | 7.49E-06                     | 0.99             |
| Lamin-associated domains           | Increased                    | 6.91E-05                              | 7.46E-05                     | 0.75             |
| High GC content (> 0.55)           | Decreased                    | 1.23E-05                              | 9.74E-06                     | 0.82             |
|                                    | Increased                    | 1.14E-05                              | 4.65E-06                     | <b>6.61E-04</b>  |
| H3K36me3                           | Decreased                    | 4.73E-06                              | 6.14E-06                     | <b>2.59E-03</b>  |
|                                    | Increased                    | 1.99E-05                              | 1.51E-05                     | <b>5.50E-10</b>  |
| CpG Islands                        | Decreased                    | 3.68E-05                              | 1.60E-04                     | <b>5.00E-117</b> |
|                                    | Increased                    | 5.39E-06                              | 6.69E-06                     | 0.79             |
| Late replication timing (< -1.25)* | Increased                    | 6.18E-06                              | 5.48E-06                     | <b>0.026</b>     |
| Early replication timing (> 1.25)* | Increased                    | 1.55E-05                              | 8.06E-06                     | <b>2.25E-02</b>  |
| DHS                                | Decreased                    | 5.03E-05                              | 3.08E-05                     | 0.99             |
|                                    | Increased                    | 1.75E-05                              | 1.21E-05                     | <b>4.92E-04</b>  |

Significant differences that are consistent with the expected direction of effect are indicated by a one-sided p-value in bold. <sup>†</sup>Four features had associations in the opposite direction, but these predicted effects could not be tested due to a lack of *de novo* mutations observed within the associated subtypes. \*Some subtypes showed a significant *negative* association with replication timing, such that the mutation rate would be higher in *early*- rather than late-replicating regions, so we tested these subtypes separately.
